# Supplementary material
Source: PubMed Central journal article supplement (PMC2775985)

# Cytokeratin

*Pten*<sup>ff</sup>

*Pten*<sup>d/d</sup>

Age  
(days)

10

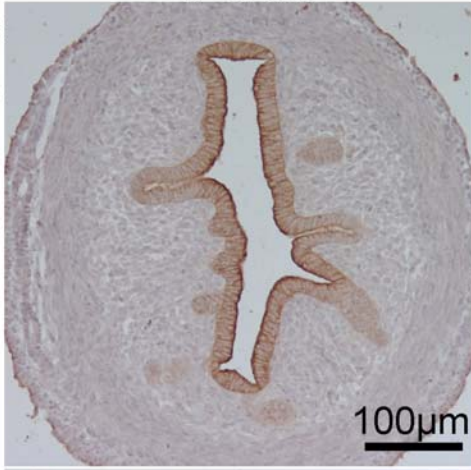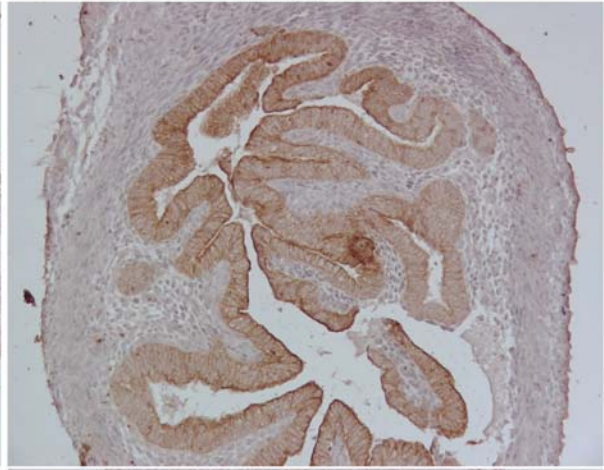

21

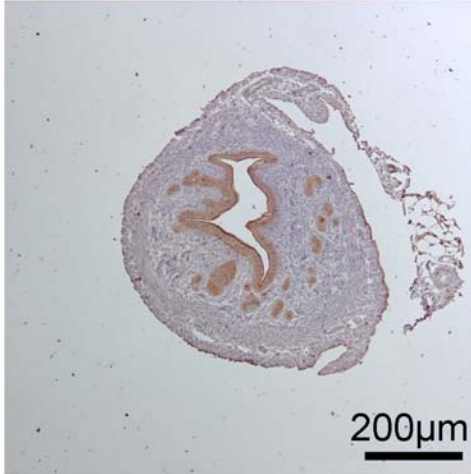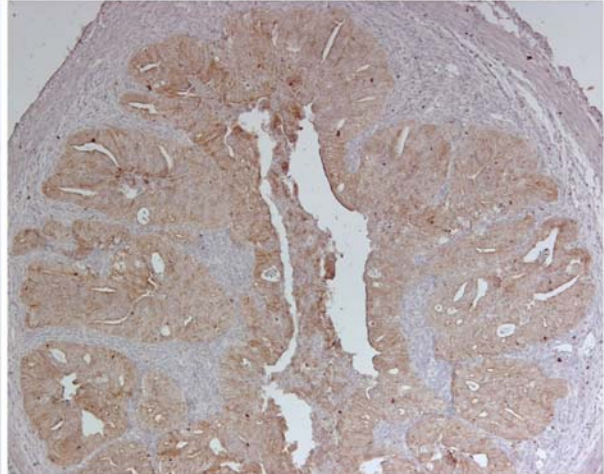

30

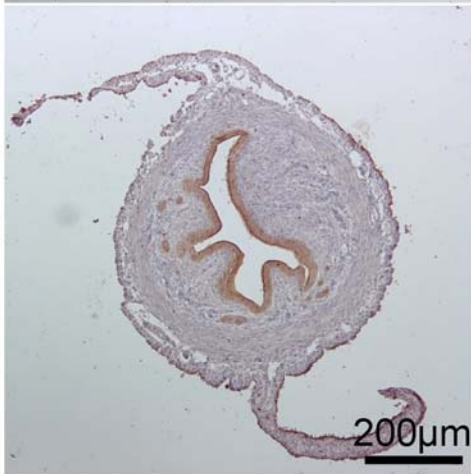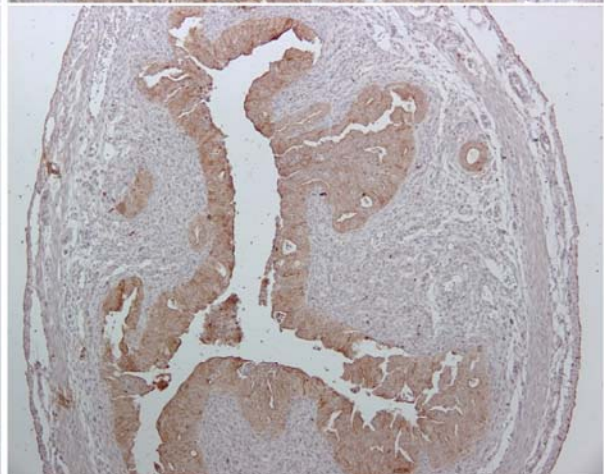

60

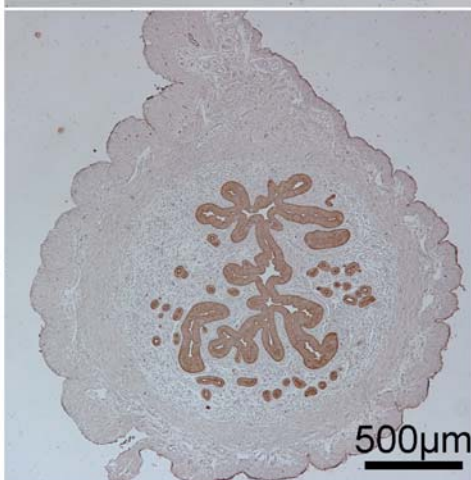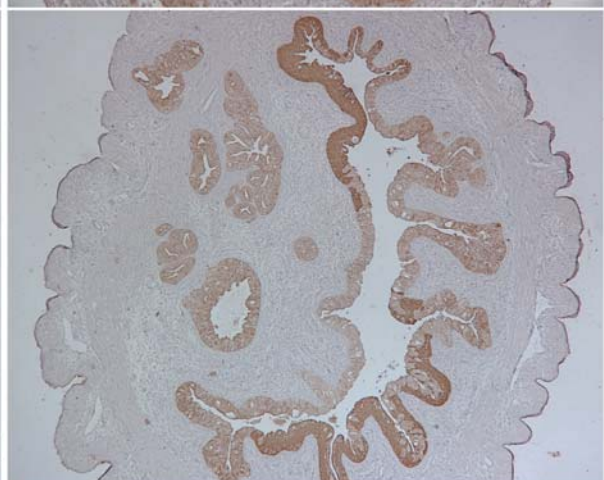

Suppl figure 1

Supplement: en.2009-0690_1.pdf [file en.2009-0690_1.pdf]

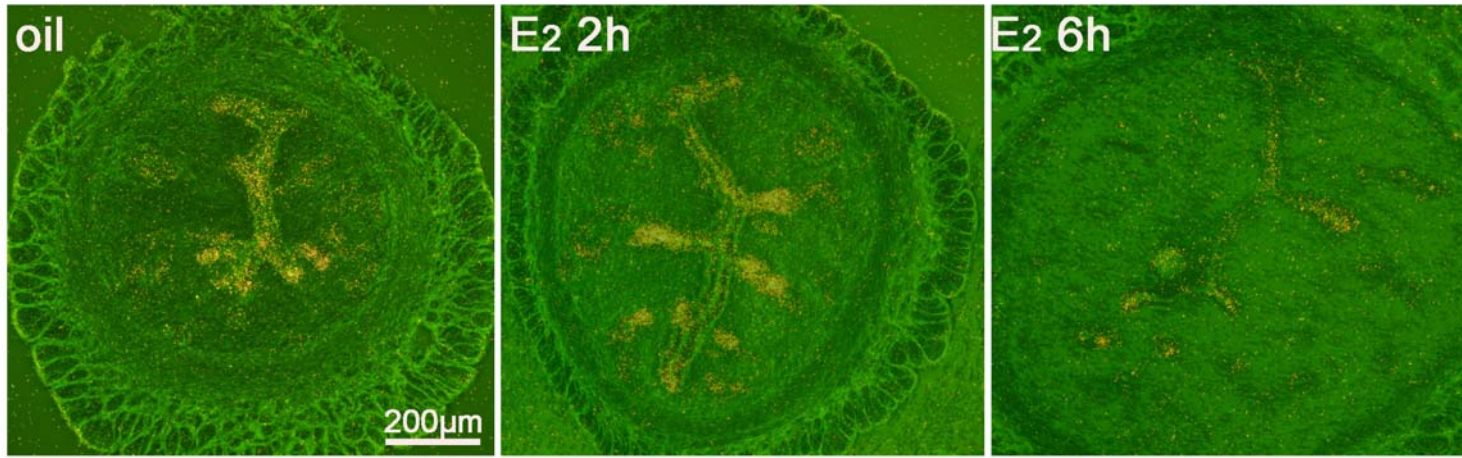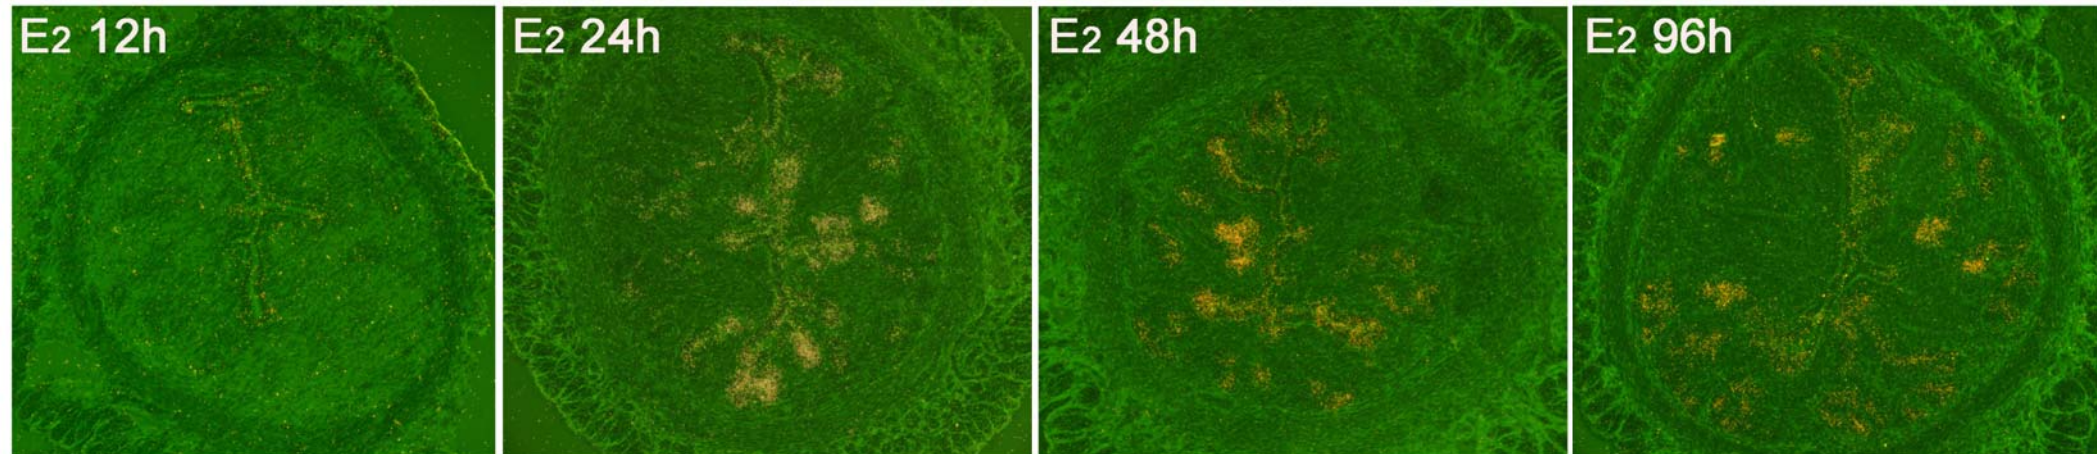

Suppl figure 2

Supplement: en.2009-0690_2.pdf [file en.2009-0690_2.pdf]

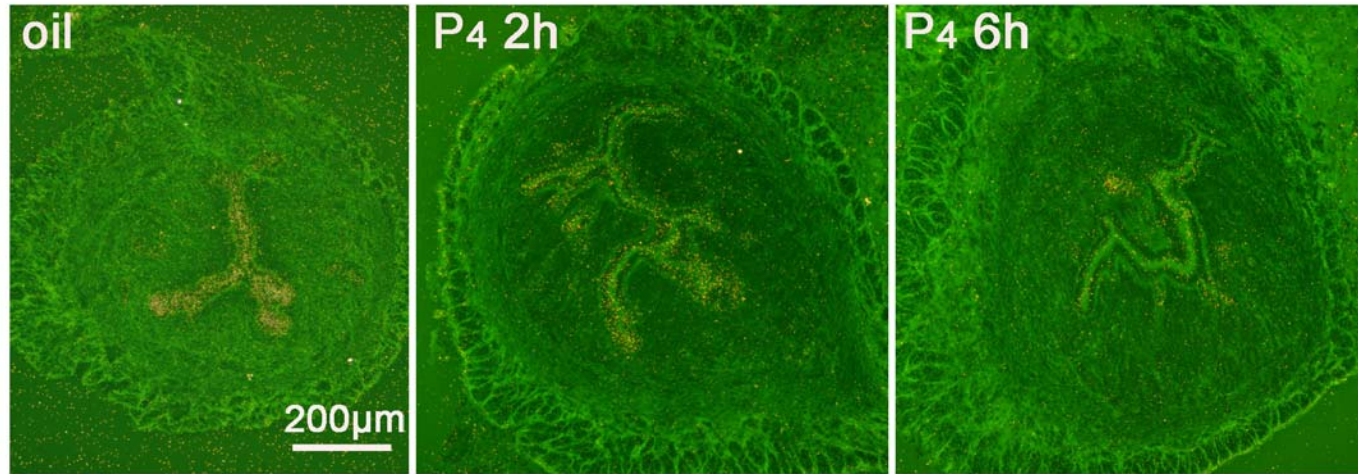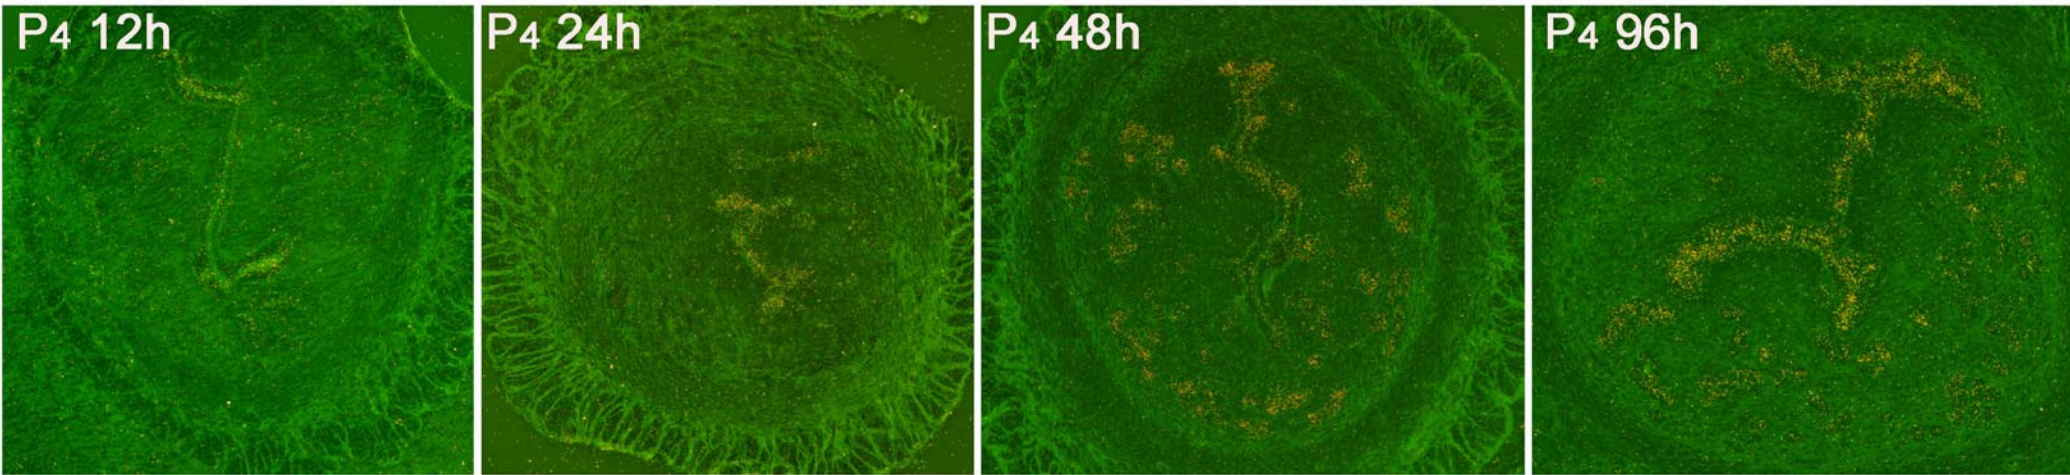

Suppl figure 3

Supplement: en.2009-0690_3.pdf [file en.2009-0690_3.pdf]
